# Supplementary material for: Outcomes of older patients aged 60 to 70 years undergoing reduced intensity transplant for acute myeloblastic leukemia: results of the NCRI acute myeloid leukemia 16 trial
Source: PubMed Central journal article supplement — Haematologica. 2021 Oct 14;107(7):1518–27. doi: 10.3324/haematol.2021.279010 (PMC9244837; doi:10.3324/haematol.2021.279010), 2021-10-14

# Outcomes of older patients aged 60 to 70 years undergoing reduced intensity transplant for acute myeloblastic leukemia: results of the NCRI acute myeloid leukemia 16 trial

Nigel H. Russell,<sup>1</sup> Robert K. Hills,<sup>2</sup> Abin Thomas,<sup>3</sup> Ian Thomas,<sup>3</sup> Lars Kjeldsen,<sup>4</sup> Mike Dennis,<sup>5</sup> Charles Craddock,<sup>6</sup> Sylvie Freeman,<sup>7</sup> Richard E. Clark<sup>8</sup> and Alan K. Burnett<sup>9</sup>

<sup>1</sup>Department of Haematology, Nottingham University Hospitals, Nottingham, UK; <sup>2</sup>Nuffield Department of Population Health, University of Oxford, Oxford, UK; <sup>3</sup>Centre for Trials Research, College of Biomedical & Life Sciences, Cardiff University, Cardiff, UK; <sup>4</sup>Department of Haematology, Rigshospitalet, Copenhagen, Denmark; <sup>5</sup>Department of Haematology, Christie Hospital, Manchester, UK; <sup>6</sup>Department of Haematology, Queen Elizabeth Hospital, Birmingham, UK; <sup>7</sup>Department of Immunology and Immunotherapy, University of Birmingham, Birmingham, UK; <sup>8</sup>Department of Molecular and Clinical Cancer Medicine, University of Liverpool, UK and <sup>9</sup>Blackwaterfoot, Isle of Arran, UK

## Correspondence:

Nigel Russell  
[nigel.russell@nottingham.ac.uk](mailto:nigel.russell@nottingham.ac.uk)

**Received:** June 22, 2021.

**Accepted:** August 19, 2021.

**Prepublished:** October 14, 2021.

<https://doi.org/10.3324/haematol.2021.279010>

©2022 Ferrata Storti Foundation  
Haematologica material is published under a CC BY-NC license 

## Supplementary Appendix

### Transplant procedures

Transplant procedures In the 144 eligible patients who received allogeneic HSCT in first remission, the median time from remission to transplant was 110 days (quartile range 83 - 156). Conditioning regimen which not specified by the protocol was fludarabine/busulfan in 40 patients, fludarabine/melphalan in 58, Fludarabine /low dose TBI in 19, Fludarabine/cyclophosphamide in 6 patients, sequential FLAMSA-type conditioning in 1 patient, unknown in 20. T- cell depletion was used in 100 cases (Campath 82, ATG 18). There was no evidence for any significant difference in survival at 5 years comparing T-cell depletion with non-T cell depletion (35% vs 49%, P-value 0.20).

Supplementary Figure 1. AML16 RIC Analysis CONSORT Diagram

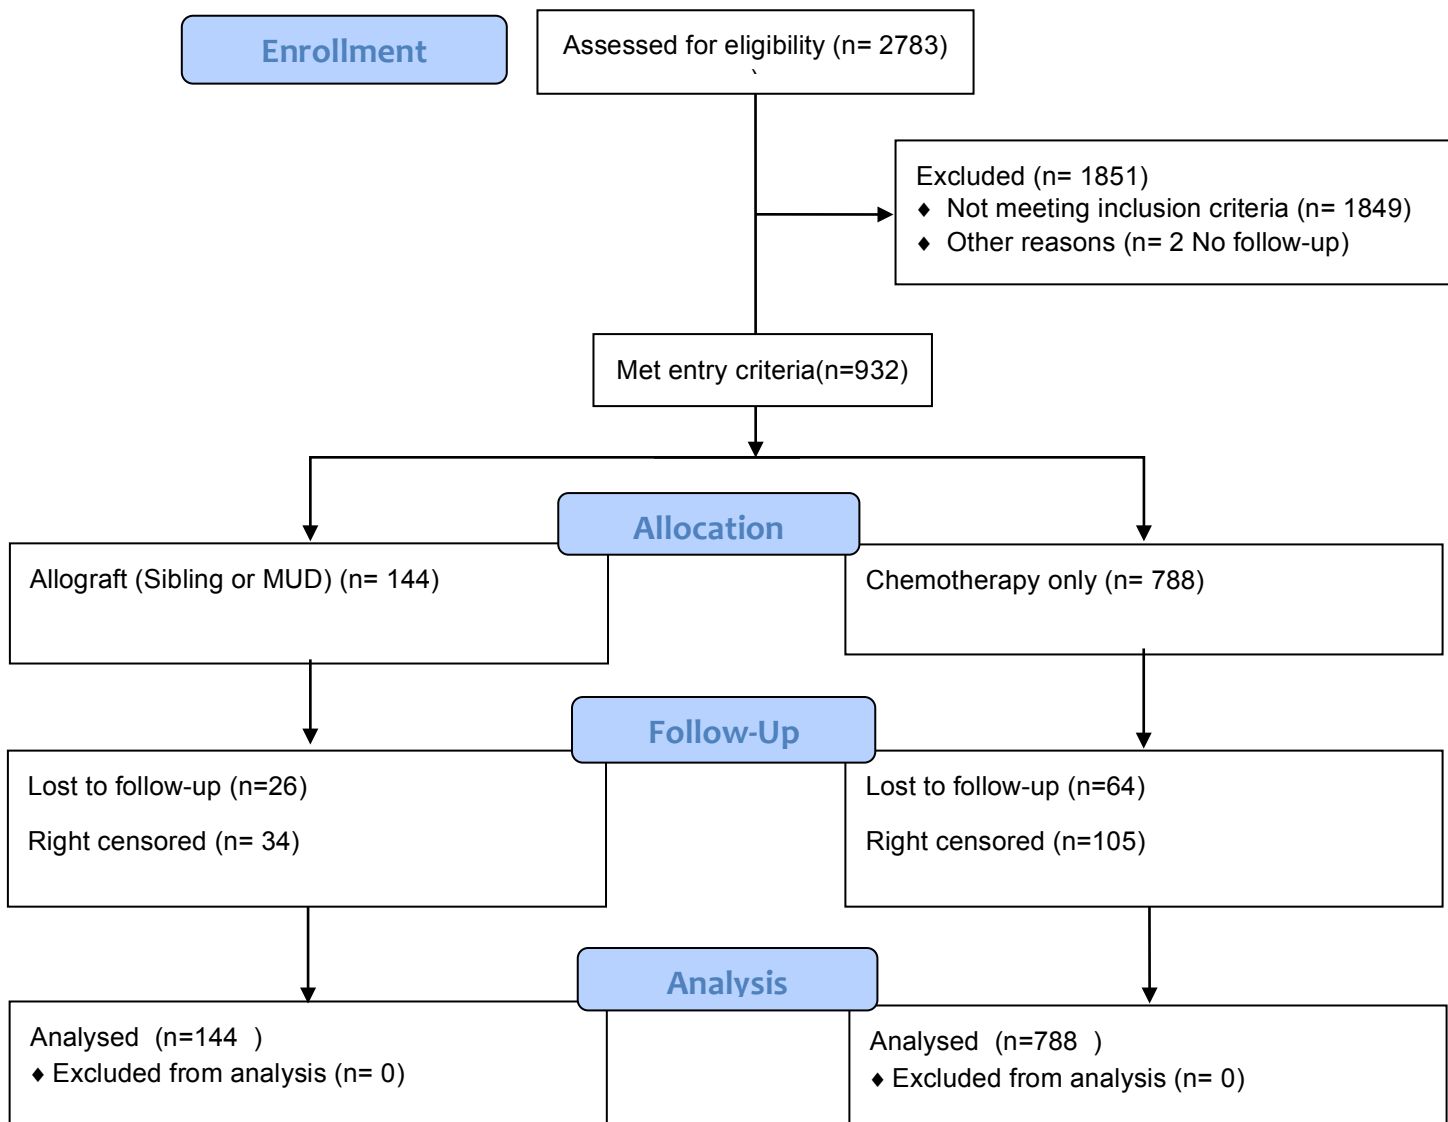

## Supplementary Figure 2. Non-relapse mortality by donor

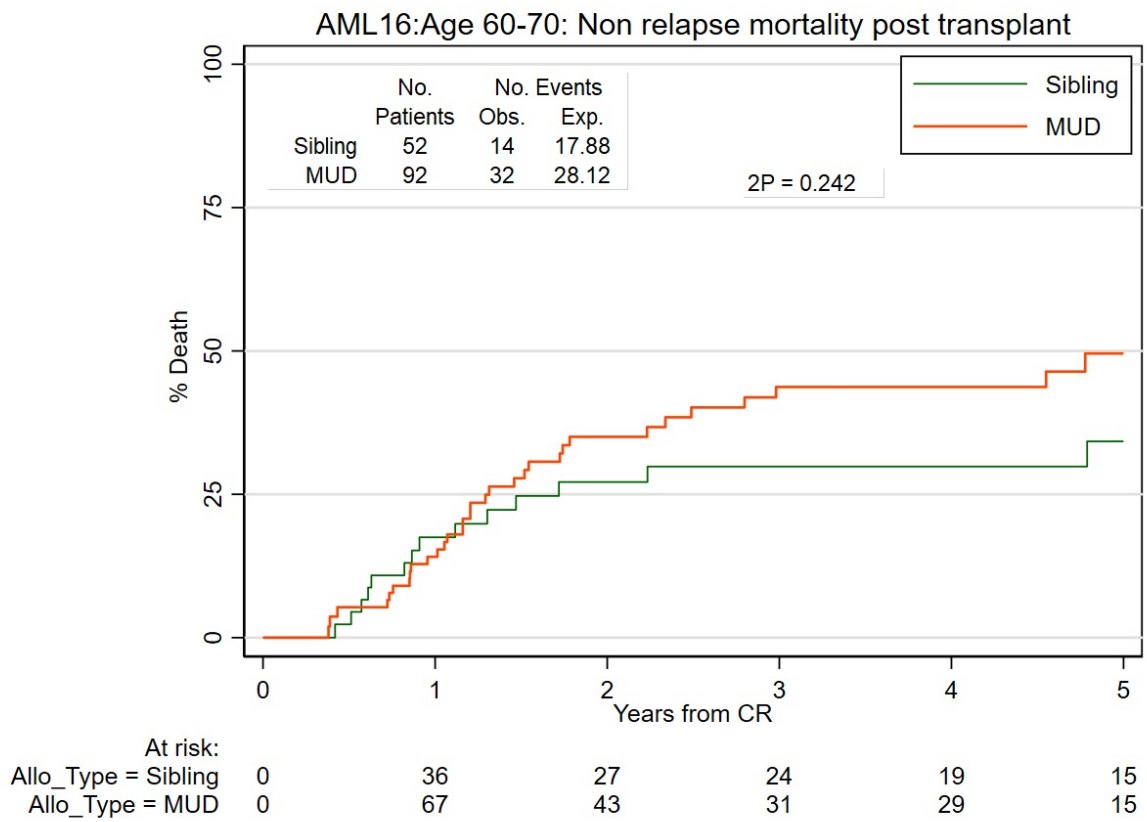

### Supplementary Figure 3. Survival by Wheatley Risk Group

#### a) Good risk

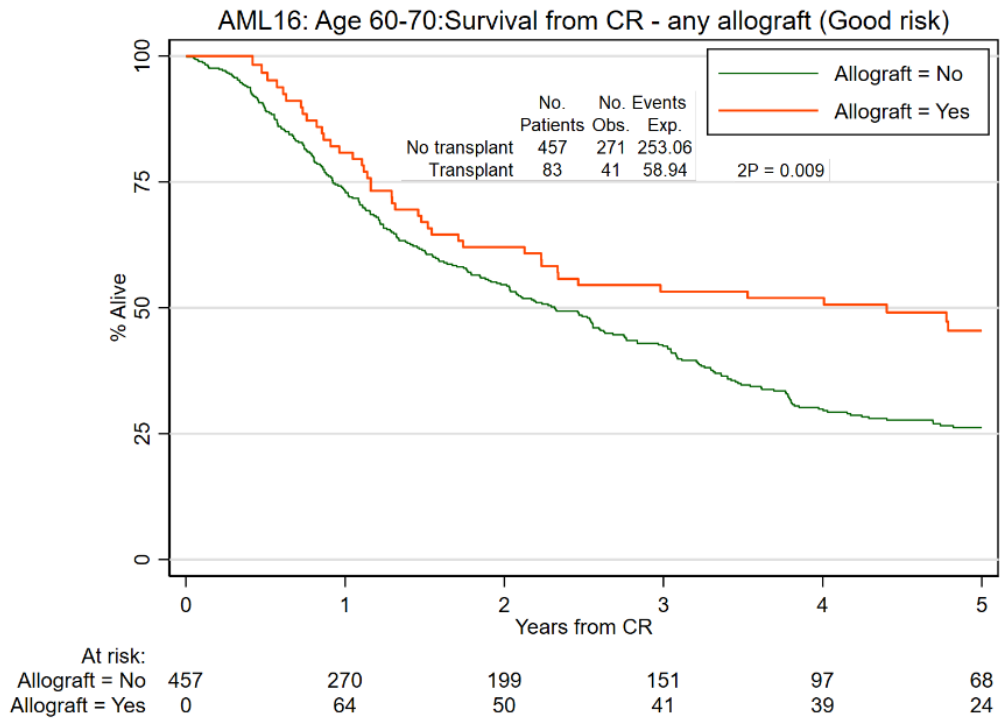

#### b) Standard Risk

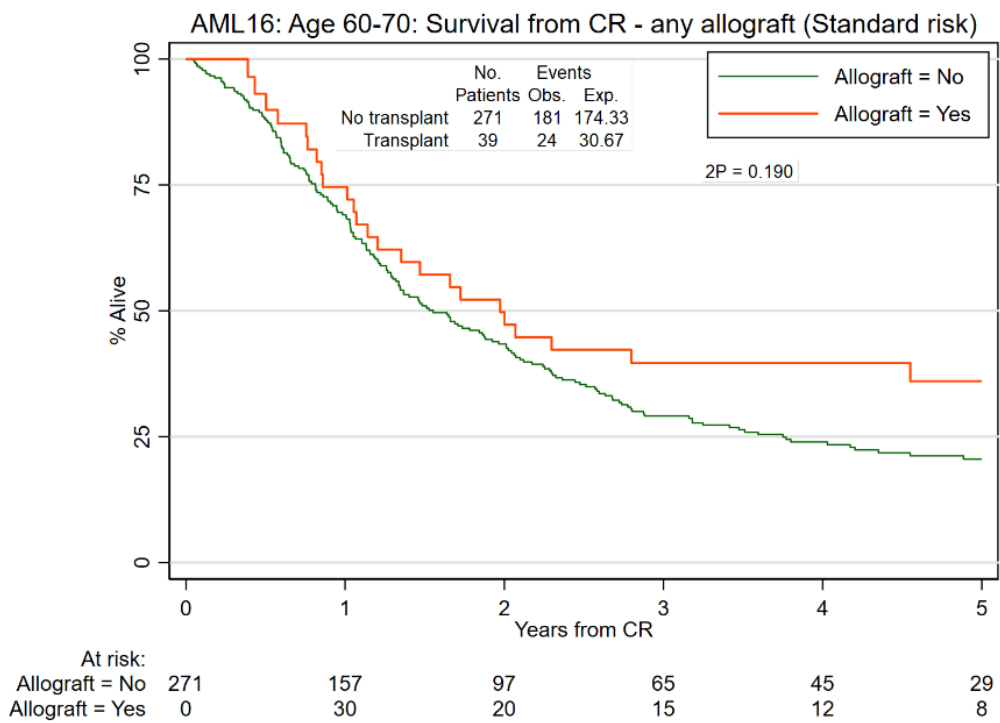

### c) Poor Risk

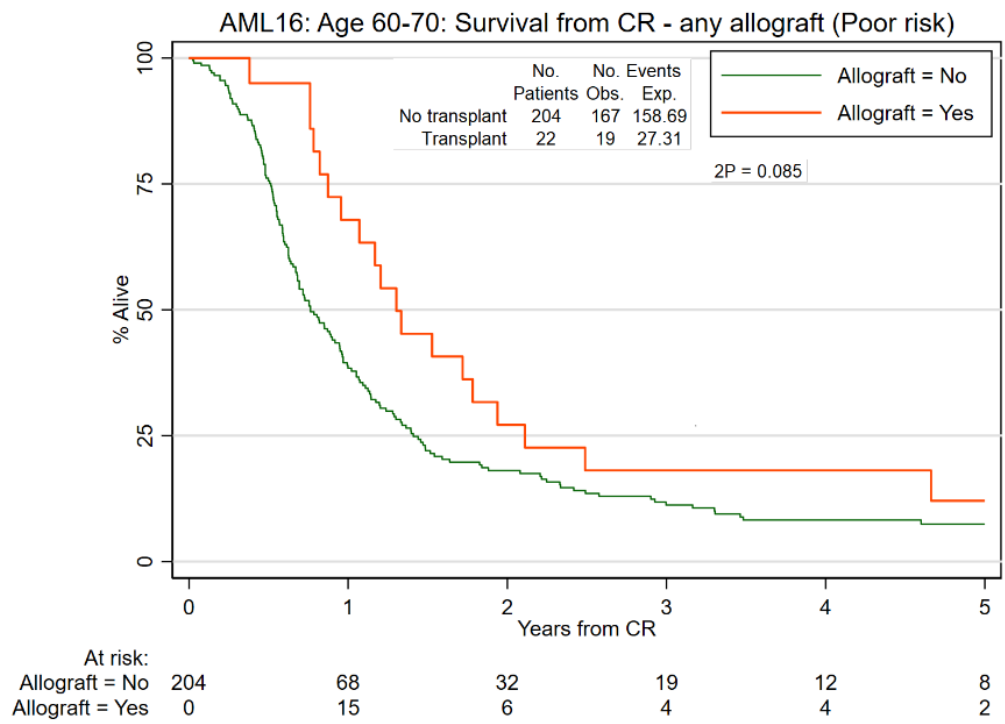

### Supplementary Figure 4. Mantel-Byar Analysis of survival by age

AML16:Allograft in 1st remission Mantel-Byar analysis of survival by age group

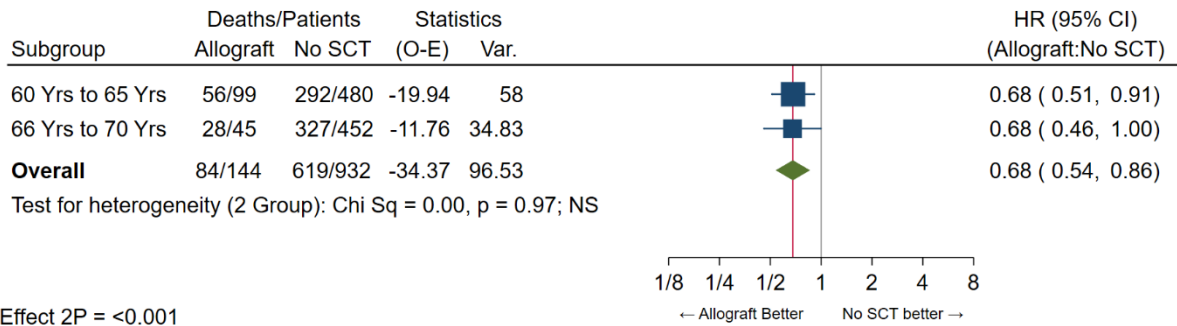

### Supplementary Figure 5. Mantel-Byar analysis of survival by cytogenetics

AML16: Allograft in 1st remission Mantel-Byar analysis of survival by Cytogenetics

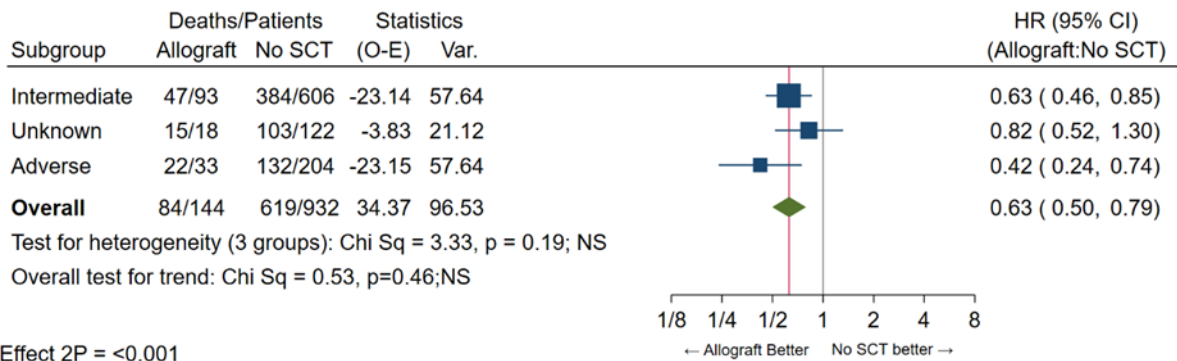

### Supplementary Figure 6. Risk of relapse. RIC versus chemotherapy

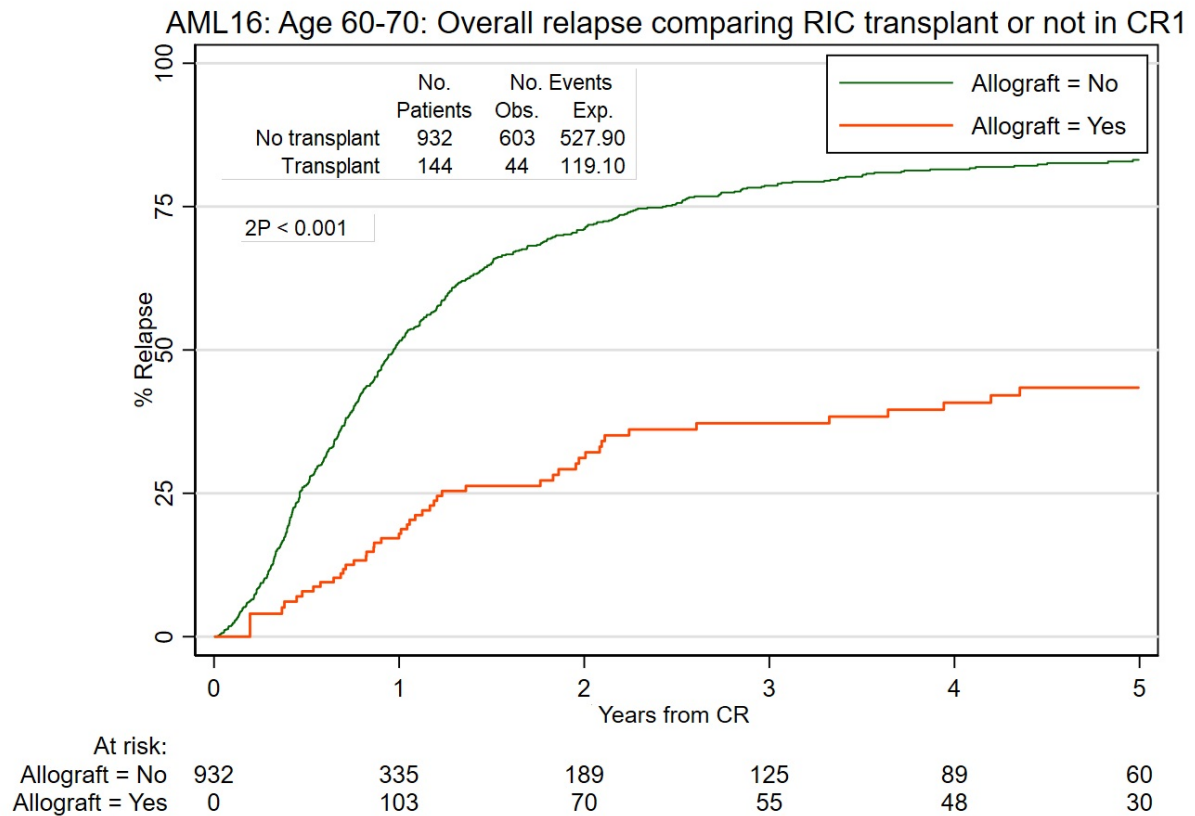

### Supplementary Figure 7. Mantel-Byar analysis of survival by HCT-CI

AML16: Allograft in 1st remission Mantel-Byar analysis of survival by comorbidities

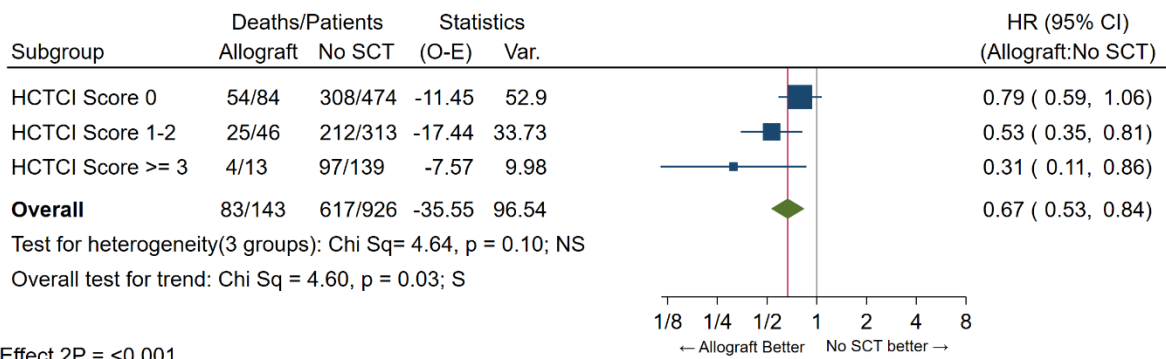

Supplement: 2021_279010_RUSSELL_SUPPL.pdf [file 2021_279010_RUSSELL_SUPPL.pdf]
